# Supplementary material
Source: PubMed Central journal article supplement (PMC2072056)
Supplement: biophysj_107.109991_3.pdf [file biophysj_107.109991_3.pdf]

Supplementary Table 1. Standard, minimum, and maximum values of parameters

| Category                                                         | Parameter | STD (min <sup>-1</sup> ) | MIN (min <sup>-1</sup> ) | MAX (min <sup>-1</sup> ) |
|------------------------------------------------------------------|-----------|--------------------------|--------------------------|--------------------------|
| binding constant of activator to DNA                             | $h_t$     | 0.002                    | $9 \times 10^{-4}$       | $5 \times 10^{-3}$       |
| dissociation constant of activator from DNA                      | $f$       | 0.08                     | 0.05                     | 0.16                     |
| transcription rate constant in the ON state                      | $g_1$     | 2                        | 1.7                      | 4                        |
| transcription rate constant in the OFF state                     | $g_0$     | 0.02                     | $< 1 \times 10^{-7}$     | 0.9                      |
| transcription rate constant<br>in the constitutive expression ** | $g_2$     | 0.2                      | 0.1                      | 0.6                      |
| degradation rate constant of mRNA **                             | $k_2$     | $\ln 2/5$                | $\ln 2/9$                | $\ln 2/4$                |
| translation rate constant                                        | $\eta$    | 0.2                      | 0.15                     | 0.3                      |
| phosphorylation rate constant                                    | $h_p$     | $1 \times 10^{-2}$       | $5 \times 10^{-4}$       | 0.2                      |
| dephosphorylation rate constant                                  | $h_p'$    | $2 \times 10^{-2}$       | $2 \times 10^{-3}$       | $> 7$                    |
| ubiquitination rate constant                                     | $h_u$     | $5 \times 10^{-3}$       | $< 1 \times 10^{-5}$     | $> 4$                    |
| complex formation                                                | $h_b$     | 0.1                      | $< 1 \times 10^{-6}$     | $> 10$                   |
| degradation rate constant<br>of unubiquitinated proteins *       | $k_1$     | $\ln 2/120$              | $< \ln 2/10^4$           | $\ln 2/40$               |
| degradation rate constant<br>of ubiquitinated proteins *         | $k_0$     | $\ln 2/5$                | $< \ln 2/10^4$           | $> \ln 2/10^{-3}$        |
| exporting rate constant of Cdc14                                 | $h_r$     | $\ln 2/160$              | $\ln 2/10^3$             | $> \ln 2/10^{-2}$        |
| importing rate constant of Cdc14                                 | $h_r'$    | $\ln 2/10$               | $< \ln 2/10^5$           | $\ln 2/0.5$              |

More than 300 reactions represented by the master equation are categorized into 15 types and a single parameter is assigned to each reaction type. Values in the third right column (STD) are used as the standard parameters. The standard limit cycle is robust when one of 15 parameters is varied in the range from the value of the second right column (MIN) to that of the first right column (MAX).

\*Half-lives of ubiquitinated proteins are several minutes or less (see *Supporting Text*) and those of unubiquitinated proteins are  $>60$  min (1-3).

\*\*Transcription frequencies of *CLN1,2*, *CLN3*, *CLB1,2*, *CLB5,6*, *SIC1*, *CDC20*, *SWI5*, and *PDS1* are estimated to be  $\sim 10^{-2}$  mRNAs/min for asynchronous cells and half-lives of these mRNAs are estimated to be 9-17 min (4). These half-lives should include time needed for the export process of mRNA to cytoplasm. Because mRNA can be translated

into proteins immediately after transcription in the present model, we set half-life of mRNA 5 min which is shorter than the experimental results.

### **References**

1. Lanker, S., Valdivieso, M. H. & Wittenberg, C. (1996) *Science* **271**, 1597-601.
2. Rudner, A. D., Hardwick, K. G. & Murray, A. W. (2000) *J. Cell Biol.* **149**, 1361-76.
3. Seufert, W., Fitcher, B. & Jentsch, S. (1995) *Nature* **373**, 78-81.
4. Holstege, F. C., Jennings, E. G., Wyrick, J. J., Lee, T. I., Hengartner, C. J., Green, M. R., Golub, T. R., Lander, E. S. & Young, R. A. (1998) *Cell* **95**, 717-28.
