# Supplementary material
Source: PubMed Central journal article supplement (PMC2072056)
Supplement: biophysj_107.109991_4.pdf [file biophysj_107.109991_4.pdf]

Supplementary Table 2. Peaks of the mRNA levels

| Gene          | Experimental results<br>(Ref.1) | Experimental results<br>(Ref.2) | Model results |
|---------------|---------------------------------|---------------------------------|---------------|
| <i>CLN3</i>   | M                               | M/G1                            | M/G1          |
| <i>CLN1,2</i> | late G1                         | late G1                         | S/G2/M        |
| <i>SIC1</i>   | early G1                        | M/G1                            | M/G1          |
| <i>CLB5,6</i> | late G1                         | late G1                         | S/G2/M        |
| <i>NDD1</i>   | -                               | S                               | S/G2          |
| <i>CLB1,2</i> | M                               | M                               | S/G2/M        |
| <i>CDC20</i>  | M                               | -                               | M             |
| <i>PDS1</i>   | S                               | -                               | S/G2/M        |
| <i>SWI5</i>   | M                               | M                               | M             |

Peaks of the mRNA levels observed in experiments and those in the present model are compared. mRNA levels are measured by concentration in experiments and by numbers in the present model.

#### References

1. Cho RJ, Campbell MJ, Winzeler EA, Steinmetz L, Conway A, Wodicka L, Wolfsberg TG, Gabrielian AE, Landsman D, Lockhart DJ, and Davis RW (1998) *Mol. Cell* 2: 65-73.
2. Breeden LL (2003) *Curr.Biol.* 13: R31-38.
