# Supplementary material
Source: PubMed Central journal article supplement (PMC2072056)
Supplement: biophysj_107.109991_5.pdf [file biophysj_107.109991_5.pdf]

Supplementary Table 3. Temporal patterns of the protein levels

| Protein | Experimental observations<br>(concentration)                                                                                                                                              | Model results<br>(number)*                                                                                                                    |
|---------|-------------------------------------------------------------------------------------------------------------------------------------------------------------------------------------------|-----------------------------------------------------------------------------------------------------------------------------------------------|
| Cln3    | The Cln3 level exhibits moderate periodicities in amplitude [1].                                                                                                                          | The Cln3 level increases about two fold in G1 phase and decreases during S phase.                                                             |
| Cln1,2  | The Cln1,2 level and the Cln1,2/Cdc28 kinase activity are maximal at START [1].                                                                                                           | The Cln1,2 level is maximal in M phase.                                                                                                       |
| Sic1    | Sic1 disappears at the G1/S transition and does not reappear until cell division [2].                                                                                                     | The Sic1 level is low at the metaphase/anaphase boundary, peaks in late G1, and decreases during S phase.                                     |
| Clb5,6  | Clb5/Cdc28 kinase activity peaks around S phase [2].<br>Clb5 localizes in the nucleus until shortly before the metaphase/anaphase transition, and then it disappears during anaphase [3]. | The Clb5,6 and Clb5,6/Cdc28 levels increase during S phase, peak around the metaphase/anaphase boundary, and start declining during anaphase. |
| Ndd1    | The phosphorylated Ndd1 level increases in the G1/S transition, remains high in G2 phase, and declines in M phase [4].                                                                    | The phosphorylated Ndd1 level increases during S and G2 phases, peaks at the metaphase/anaphase boundary, and decreases during anaphase.      |
| Clb1,2  | The Clb2 level peaks in M phase [5] and starts declining during anaphase B [6].                                                                                                           | The Clb1,2 level increases during S phase, peaks at the metaphase/anaphase boundary, and decreases during anaphase.                           |
| Cdc20   | The Cdc20 level is low in S phase, peaks in M phase, and declines at the M/G1 boundary [5].                                                                                               | The Cdc20 level is low in S phase, increases until the anaphase/telophase boundary, and then decreases.                                       |
| Pds1    | Pds1 disappears shortly before the onset of anaphase [6, 7].                                                                                                                              | The Pds1 level is low in G1 phase, increases during S and G2 phases, and then starts declining in metaphase.                                  |

|      |                                                                                                                                                                                                                                                                               |                                                                                                                                                                              |
|------|-------------------------------------------------------------------------------------------------------------------------------------------------------------------------------------------------------------------------------------------------------------------------------|------------------------------------------------------------------------------------------------------------------------------------------------------------------------------|
| Swi5 | <p>Prior to anaphase, Swi5 is phosphorylated and localizes in cytoplasm, but it is dephosphorylated and translocated to nucleus around the anaphase/telophase boundary [8, 9].</p> <p>Most of Swi5 located in the nucleus is degraded by the time of cell separation [9].</p> | <p>The total Swi5 level peaks in M phase. The phosphorylated Swi5 level, which is assumed to locate in nucleus, sharply peaks at around the anaphase/telophase boundary.</p> |
|------|-------------------------------------------------------------------------------------------------------------------------------------------------------------------------------------------------------------------------------------------------------------------------------|------------------------------------------------------------------------------------------------------------------------------------------------------------------------------|

\*The protein levels are observed in concentration in experiments but in molecular numbers in the model.

#### References

1. Cross FR, and Blake CM (1993) *Mol. Cell Biol.* 13: 3266-3271.
2. Schwob E, Bohm T, Mendenhall MD, and Nasmyth K (1994) *Cell* 79: 233-244.
3. Shirayama M, Toth A, Galova M, and Nasmyth K (1999) *Nature* 402: 203-207.
4. Darieva Z, Pic-Taylor A, Boros J, Spanos A, Geymonat M, Reece RJ, Sedgwick SG, Sharrocks AD, and Morgan BA (2003) *Curr. Biol.* 13: 1740-1745.
5. Prinz S, Hwang ES, Visintin R, and Amon A (1998) *Curr. Biol.* 8: 750-760.
6. Shirayama M, Zachariae W, Ciosk R, and Nasmyth K (1998) *EMBO J.* 17: 336-1349.
7. Jaspersen SL, Charles JF, Tinker-Kulberg RL, and Morgn DO (1998) *Mol. Biol. Cell* 9: 2803-2817.
8. Moll T, Tebb G, Surana U, Robitsch H, and Nasmyth K (1991) *Cell* 66: 743-758.
9. Nasmyth K, Adolf G, Lydall D, and Seddon A (1990) *Cell* 62: 631-647.
